# Supplementary material
Source: PubMed Central journal article supplement (PMC10481327)
Supplement: jamainternmed-e234291-s002.pdf [file jamainternmed-e234291-s002.pdf]

## Data Sharing Statement

Ley. Defining Usual Oral Temperature Ranges in Outpatients Using an Unsupervised Learning Algorithm. *JAMA Intern Med*. Published September 05, 2023.

doi:10.1001/jamainternmed.2023.4291

### Data

**Data available:** Yes

**Data types:** Deidentified encounter and participant data

**How to access data:** Data are available at <https://doi.org/10.5061/dryad.3tx95x6mt>.

**When available:** With publication

### Supporting Documents

**Document types:** Statistical/analytic code

**How to access documents:** Code (R and SAS) is available at <https://doi.org/10.5061/dryad.3tx95x6mt>

**When available:** With publication

### Additional Information

**Who can access the data:** Data will be available within the publication, so to anyone interested.

**Types of analyses:** All.

**Mechanisms of data availability:** The deidentified data will be available to anyone.

**Any additional restrictions:** None
